# Supplementary material for: Multiple instance learning-based prediction of programmed death-ligand 1 (PD-L1) expression from hematoxylin and eosin (H&E)-stained histopathological images in breast cancer
Source: PeerJ. 2025 Apr 15;13:e19201. doi: 10.7717/peerj.19201 (PMC12007500; doi:10.7717/peerj.19201)
Supplement: Supplemental Information 1 [file peerj-13-19201-s001.xls]

## Sheet: Sheet1
auroc.py
读取 Excel 文件	Read Excel file
为每个文件绘制 ROC 曲线	Draw ROC curve for each file
提取 ground_truth 和 logits 列	Extract the 'ground_truth' and 'logits' columns
将字符串形式的 tensor 转换为浮点数	Convert the string-formatted tensor to a floating-point number
计算预测概率（sigmoid 函数）	Calculate the prediction probability (sigmoid function)
将 probs 作为新的一列添加到原始数据中	Add 'probs' as a new column to the original data
将结果保存为新的表格	Save the results as a new table
计算 Sensitivity - Specificity 曲线	Calculate the Sensitivity - Specificity curve
绘制散点图	Draw a scatter plot
将 neg 和 pos 的标签分别添加到图例中	Add the labels for 'neg' and 'pos' to the legend respectively
红点表示 neg	Red dots represent 'neg'
绿点表示 pos	Green dots represent 'pos'
添加横线	Add a horizontal line
图表设置	Chart settings
以 300 dpi 保存以获得更高质量	Save with 300 dpi for higher quality
显示图表	Display the chart
classifier.py
分类器（Lightning 模块）	Classifier (Lightning Module)
配置	configuration
模型	model
优化器	optimizer
学习率调度器	learning rate scheduler
标签平滑损失	Label Smoothing Loss
焦点损失	Focal Loss
任务	task
二分类	binary classification
多分类任务	multi-class classification task
训练步骤	training step
批次索引	batch index
特征	features
坐标	coordinates
标签	labels
分类损失	classification loss
分类概率	classification probability
分类预测	classification prediction
回归头的损失	regression head loss
回归概率	regression probability
回归预测	regression prediction
总损失	total loss
验证步骤	validation step
验证集准确率	validation set accuracy
验证集 AUC-ROC	validation set AUROC
验证集 F1 分数	validation set F1 score
验证集精确率	validation set precision
验证集召回率	validation set recall
验证集特异度	validation set specificity
混淆矩阵	confusion matrix
测试步骤	test step
测试集准确率	test set accuracy
测试集 AUC-ROC	test set AUROC
测试集 F1 分数	test set F1 score
测试集精确率	test set precision
测试集召回率	test set recall
测试集特异度	test set specificity
患者	patient
真实值	ground truth
预测值	prediction
对数几率	logits
正确	correct
每个测试数据集	per test dataset
测试输出	test outputs
归一化混淆矩阵	normalize the confusion matrix
热力图	heatmap
日志记录（记录到 WandB）	log (log to WandB)
重置	reset
data.py
生成一个基于临床信息和可用切片的队列数据框	Generate a cohort DataFrame based on clinical information and available slides.
从临床表文件（CSV 或 Excel 格式）中读取数据	Read data from the clinical table file (CSV or Excel format)
从切片 CSV 文件中读取数据	Read data from the slide CSV file
合并数据框	Merge dataframes
移除列	Remove columns
移除行 / 切片	Remove rows/slides
非有效标签	Non-valid labels
检查是否是	Check if it is
转换类型	Convert the type
检查是否为数字	Check if it is a digit
移除我们没有的切片	Remove the slides we don't have
没有在特征目录中找到特征	No features found in the feature directory
按患者分组并取第一条记录	Group by patient and take the first record
每个患者的切片列表	List of slides per patient
转换临床信息	Transform clinical information
将分类特征的列转换为整数并进行归一化	Transform columns with categorical features to integers and normalize them
填充缺失值	Fill missing values
调整均值和标准差到期望的值	Adjust the mean and standard deviation to the desired values
更新临床信息字典	Update the clinical information dictionary
生成一个多队列数据框，连接来自单个队列的数据框	Generate a multi-cohort DataFrame concatenating the DataFrame from single cohorts.
数据配置文件路径	Path to the data configuration file
包含在多队列数据框中的队列列表	List of cohorts to include in the multi-cohort DataFrame
要预测的目标标签列表	List of target labels to be predicted
从标签名称到数值目标的映射字典	Dict of mappings from label names to numerical targets
归一化方法	Normalization method
特征提取器	Feature extractor
联合数据集中的患者数量与各个数据集的总和不相等	The number of patients in the joint dataset is not equal to the sum of each individual dataset
多实例学习（MIL）数据集	Multiple Instance Learning (MIL) dataset
输入数据包含标签和特征向量路径	Input data containing the labels and paths to feature vectors
从输入数据中选择的索引	The indices to select from the input data
要预测的目标标签	The target labels to be predicted
临床信息字典	Clinical information dictionary
采样的切片数量	The number of tiles to sample
如果切片数量少于指定数量，是否用零填充切片	Whether to pad tiles with zeros if the number of tiles is less than the specified number
特征的归一化方法	The normalization method for features
从.h5 文件中加载特征和坐标	Load features and coords from .h5 file
加载增强特征（如果使用了增强）	Load augmented features if augmentation is used
判定张量大小是否大于	Determine if the tensor size is greater than
如果是则进行截取	If so, perform truncation
定义正则表达式模式以提取	Define a regular expression pattern to extract
用于存储转换后的结果	Used to store the converted results
随机采样指定数量的切片	Randomly sample the specified number of tiles
如果切片数量小于指定数量且需要填充，则用零填充	If the number of tiles is less than the specified number and padding is required, pad with zeros
也填充坐标向量	Also pad the coords vector
为了在数据加载器中堆叠	For stacking in the dataloader
从分类标签创建二进制或数值标签	Create binary or numeric labels from categorical labels
Scatter_plot.py
读取 csv 文件	Read the CSV file
用作 x 轴的索引	Used as the index for the x-axis
将字符串形式的 tensor 转换为浮点数	Convert the string-formatted tensor to a floating-point number
根据 correct 列选择颜色	Select colors based on the 'correct' column
绘制散点图	Draw a scatter plot
将 neg 和 pos 的标签分别添加到图例中	Add the labels for 'neg' and 'pos' to the legend respectively
红点表示 neg	Red dots represent 'neg'
绿点表示 pos	Green dots represent 'pos'
添加横线	Add a horizontal line
图表设置	Chart settings
以 300 dpi 保存以获得更高质量	Save with 300 dpi for higher quality
显示图表	Display the chart
test_k-fold.py
计算类别 0 和类别 1 的样本数量	Calculate the number of samples in class 0 and class 1
类别 1 的样本数量	Number of samples in class 1
类别 0 的样本数量	Number of samples in class 0
train_k-fold.py
计算类别 0 和类别 1 的样本数量	Calculate the number of samples in class 0 and class 1
类别 1 的样本数量	Number of samples in class 1
类别 0 的样本数量	Number of samples in class 0
为类别 0 和类别 1 设置权重	Set weights for class 0 and class 1
假设你想将类别 0 的权重调低 5 倍	Assume you want to reduce the weight of class 0 by 5 times
类别 0 的权重调低 5 倍	The weight of class 0 is reduced by 5 times
类别 1 的权重保持不变	The weight of class 1 remains unchanged
根据类别数量计算权重，类别数量少的权重大	Calculate weights based on the number of samples in each class, with a larger weight for the class with fewer samples
类别 0 的权重	Weight of class 0
类别 1 的权重	Weight of class 1
创建每个样本的权重	Create weights for each sample
转换为 Tensor	Convert to Tensor
创建 WeightedRandomSampler	Create a WeightedRandomSampler
创建 train_dataloader 时使用 sampler	Use the sampler when creating the train_dataloader
清理缓存	Clean up the cache
transmil.py
选择使用编号为 1 的 GPU 设备	Select to use the GPU device numbered 1
计算网格尺寸	Calculate the grid size
创建 base_grid	Create the base_grid
动态计算 grid_indices（在网格中的位置）	Dynamically calculate grid_indices (positions in the grid)
检查 patch 的数量是否适合放入网格	Check if the number of patches can fit into the grid
将每个 patch 的特征放置到 base_grid 的相应位置	Place the features of each patch into the corresponding position of the base_grid
直接使用高级索引将 patch 特征放入 base_grid 的相应位置	Directly use advanced indexing to place the patch features into the corresponding positions of the base_grid
若 patch 数量超过网格容量，可能需要截断或其他操作	If the number of patches exceeds the grid capacity, truncation or other operations may be required
回归头预测	Prediction of the regression head
